# Supplementary material
Source: Springer Nature journal article supplement (https://www.springerprofessional.de/resource/supplementary/13638_2014_999_MOESM9_ESM.pdf/11898978)

Average correlation between MIMO channels for 10 best resource blocks

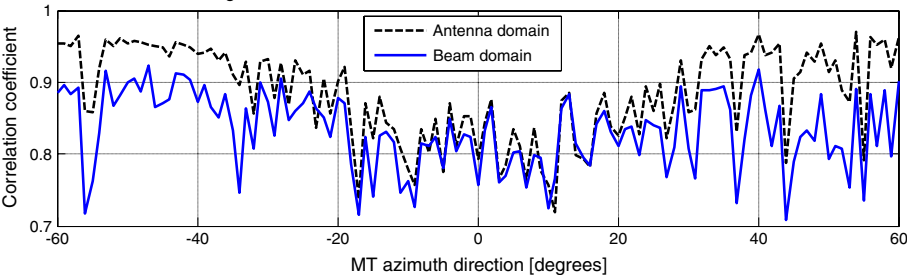

Average Eigenvalues of 2x2 MIMO channel matrices for 10 best resource blocks

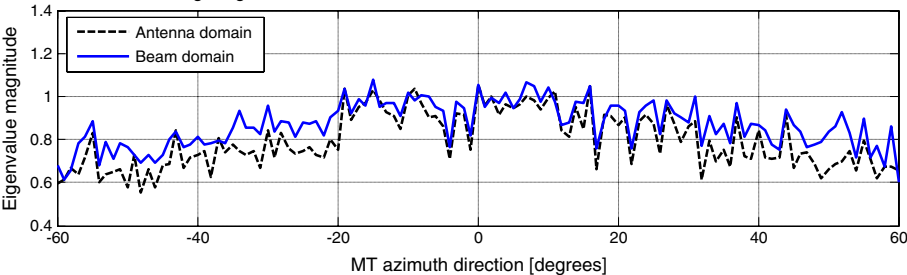

Supplement: MOESM9 [file 11898978]
